# Supplementary material for: 1H-NMR Plasma Lipoproteins Profile Analysis Reveals Lipid Metabolism Alterations in HER2-Positive Breast Cancer Patients
Source: MDPI journal article supplement (doi:10.3390/cancers13225845), 2021-11-21
Supplement: s1 [file s1]

## Article

# **$^1\text{H}$ -NMR plasma lipoproteins profile analysis reveals lipid metabolism alterations in HER2-positive breast cancer patients**

**Giuseppe Corona<sup>1§\*</sup>, Emanuela Di Gregorio<sup>1,2§</sup>, Alessia Vignoli<sup>4,5</sup>, Elena Muraro<sup>1</sup>, Agostino Steffan<sup>1</sup> and Gianmaria Miolo<sup>3</sup>**

<sup>1</sup> IRCCS Centro di Riferimento Oncologico di Aviano (CRO), Immunopathology and Cancer Biomarkers Unit, 33081 Aviano, Italy; emanuela.digregorio@cro.it (E.D.G.); emuraro@cro.it (E.M.); asteffan@cro.it (A.S.)

<sup>2</sup> Ca' Foscari University of Venice, Department of Molecular Science and Nano Systems, Via Torino 155, Venezia Mestre, 30172 Venice, Italy

<sup>3</sup> Magnetic Resonance Center (CERM), Department of Chemistry "Ugo Schiff", University of Florence, Via Luigi Sacconi 6, 50019 Sesto Fiorentino, Italy; vignoli@cerm.unifi.it

<sup>4</sup> Consorzio Interuniversitario Risonanze Magnetiche di Metallo Proteine, 50019 Sesto Fiorentino, Italy

<sup>5</sup> IRCCS Centro di Riferimento Oncologico di Aviano (CRO), Medical Oncology and Cancer Prevention Unit, 33081 Aviano, Italy; gmiolo@cro.it

\* Correspondence: giuseppe.corona@cro.it; Tel.: +39-0434-659-666

§ Equal contributions

\* Correspondence: giuseppe.corona@cro.it (G.C.); Tel.: +39-0434-659666 (G.C.)

**Table S1.** List of lipoproteins measured by <sup>1</sup>H NRM

|        | TGs | Chol | Free Chol | PLs | Apo-A1 | Apo-A2 | Apo-B | P.N. |
|--------|-----|------|-----------|-----|--------|--------|-------|------|
| VLDL   | ✓   | ✓    | ✓         | ✓   | -      | -      | ✓     | ✓    |
| IDL    | ✓   | ✓    | ✓         | ✓   | -      | -      | ✓     | ✓    |
| LDL    | ✓   | ✓    | ✓         | ✓   | -      | -      | ✓     | ✓    |
| HDL    | ✓   | ✓    | ✓         | ✓   | ✓      | ✓      | -     | -    |
| VLDL 1 | ✓   | ✓    | ✓         | ✓   | -      | -      | ✓     | -    |
| VLDL 2 | ✓   | ✓    | ✓         | ✓   | -      | -      | ✓     | -    |
| VLDL 3 | ✓   | ✓    | ✓         | ✓   | -      | -      | ✓     | -    |
| VLDL 4 | ✓   | ✓    | ✓         | ✓   | -      | -      | ✓     | -    |
| VLDL 5 | ✓   | ✓    | ✓         | ✓   | -      | -      | ✓     | -    |
| VLDL 6 | ✓   | ✓    | ✓         | ✓   | -      | -      | ✓     | -    |
| LDL 1  | ✓   | ✓    | ✓         | ✓   | -      | -      | ✓     | ✓    |
| LDL 2  | ✓   | ✓    | ✓         | ✓   | -      | -      | ✓     | ✓    |
| LDL 3  | ✓   | ✓    | ✓         | ✓   | -      | -      | ✓     | ✓    |
| LDL 4  | ✓   | ✓    | ✓         | ✓   | -      | -      | ✓     | ✓    |
| LDL 5  | ✓   | ✓    | ✓         | ✓   | -      | -      | ✓     | ✓    |
| LDL 6  | ✓   | ✓    | ✓         | ✓   | -      | -      | ✓     | ✓    |
| HDL 1  | ✓   | ✓    | ✓         | ✓   | ✓      | ✓      | -     | -    |
| HDL 2  | ✓   | ✓    | ✓         | ✓   | ✓      | ✓      | -     | -    |
| HDL 3  | ✓   | ✓    | ✓         | ✓   | ✓      | ✓      | -     | -    |
| HDL 4  | ✓   | ✓    | ✓         | ✓   | ✓      | ✓      | -     | -    |

TGs, tryglicerides; Chol, cholesterol; Apo, apolipoprotein; PLs, phospholipids; P.N, particle numbers; ✓, detected but not quantified; ✓, detected and quantified.

**Table S2.** Lipoproteins significantly altered in BC patients and in the CTR group baseline plasma.

|                         | <b>HER2 (+) BC</b><br><b>Mean ± SE</b><br><b>(n = 43)</b> | <b>CTR</b><br><b>Mean ± SE</b><br><b>(n = 28)</b> | <b>p- value</b> | <b>q-value</b> |
|-------------------------|-----------------------------------------------------------|---------------------------------------------------|-----------------|----------------|
| <b>TG</b>               | 105.4 ± 8.3                                               | 76.4 ± 6.1                                        | 0.005           | 0.024          |
| <b>Free Chol-VLDL-2</b> | 1.5 ± 0.2                                                 | 0.5 ± 0.1                                         | 4.1E-07         | 3.6E-05        |
| <b>Chol-VLDL-2</b>      | 3.9 ± 0.4                                                 | 1.6 ± 0.2                                         | 2.4E-05         | 4.7E-04        |
| <b>TG-VLDL-3</b>        | 10.4 ± 1.0                                                | 4.7 ± 0.6                                         | 2.8E-05         | 4.7E-04        |
| <b>Chol-VLDL</b>        | 20.5 ± 1.9                                                | 11.6 ± 1.4                                        | 6.9E-05         | 0.001          |
| <b>PL-VLDL</b>          | 19.8 ± 1.5                                                | 12.9 ± 1.3                                        | 3.7E-04         | 0.004          |
| <b>Chol-VLDL-1</b>      | 6.3 ± 0.7                                                 | 3.5 ± 0.5                                         | 4.2E-04         | 0.004          |
| <b>Free Chol-VLDL</b>   | 9.1 ± 0.7                                                 | 6.1 ± 0.6                                         | 0.001           | 0.006          |
| <b>PL-VLDL-2</b>        | 3.1 ± 0.3                                                 | 1.5 ± 0.2                                         | 0.002           | 0.014          |
| <b>VLDL Particle N.</b> | 130.5 ± 10.4                                              | 95.7 ± 9.7                                        | 0.012           | 0.049          |
| <b>Apo-B-VLDL</b>       | 7.2 ± 0.6                                                 | 5.3 ± 0.5                                         | 0.012           | 0.049          |
| <b>PL-LDL-6</b>         | 8.8 ± 0.7                                                 | 13.7 ± 0.7                                        | 4.9E-06         | 2.1E-04        |
| <b>TG-LDL-2</b>         | 2.9 ± 0.1                                                 | 2.1 ± 0.1                                         | 1.1E-05         | 3.0E-04        |
| <b>Chol-LDL</b>         | 93.6 ± 3.9                                                | 114.3 ± 5.7                                       | 0.003           | 0.017          |
| <b>TG-LDL-4</b>         | 2.9 ± 0.2                                                 | 2.1 ± 0.2                                         | 0.008           | 0.037          |
| <b>Free Chol-LDL-5</b>  | 3.5 ± 0.2                                                 | 4.7 ± 0.4                                         | 0.012           | 0.049          |
| <b>TG-LDL</b>           | 20.8 ± 0.9                                                | 17.2 ± 1.1                                        | 0.012           | 0.049          |
| <b>Free Chol-HDL-4</b>  | 3.3 ± 0.1                                                 | 4.2 ± 0.2                                         | 6.5E-05         | 0.001          |
| <b>Apo-A2-HDL-4</b>     | 18.6 ± 0.5                                                | 21.6 ± 0.7                                        | 0.001           | 0.008          |
| <b>Chol-HDL-4</b>       | 21.1 ± 0.6                                                | 23.8 ± 0.7                                        | 0.002           | 0.013          |
| <b>PL-HDL-2</b>         | 14.1 ± 0.6                                                | 13.4 ± 0.2                                        | 0.005           | 0.024          |

SE, standard error; q-value= FRD

**Table S3.** Significant time-related changes of lipoproteins by ANOVA\*

| Name              | p- value | q- value | T1 | T2 | T3 | T4 | T5 | T6 | T7 |
|-------------------|----------|----------|----|----|----|----|----|----|----|
| Chol-HDL          | 1.41E-08 | 4.80E-07 |    |    |    |    |    |    |    |
| Free Chol-HDL     | 0.001    | 0.003    |    |    |    |    |    |    |    |
| Chol-LDL/Chol-HDL | 2.01E-05 | 1.35E-04 |    |    |    |    |    |    |    |
| Apo-B100/Apo-A1   | 4.81E-05 | 2.89E-04 |    |    |    |    |    |    |    |
| PL-HDL            | 8.77E-09 | 4.80E-07 |    |    |    |    |    |    |    |
| Apo-A1-HDL        | 1.68E-08 | 4.80E-07 |    |    |    |    |    |    |    |
| Apo-A2-HDL        | 3.68E-06 | 3.02E-05 |    |    |    |    |    |    |    |
| Chol-HDL-1        | 7.77E-07 | 9.84E-06 |    |    |    |    |    |    |    |
| Chol-HDL-2        | 3.70E-06 | 3.02E-05 |    |    |    |    |    |    |    |
| Chol-HDL-3        | 1.82E-05 | 1.30E-04 |    |    |    |    |    |    |    |
| Chol-HDL-4        | 3.99E-04 | 0.002    |    |    |    |    |    |    |    |
| Free Chol-HDL-1   | 0.001    | 0.004    |    |    |    |    |    |    |    |
| Free Chol-HDL-2   | 0.005    | 0.020    |    |    |    |    |    |    |    |
| Free Chol-HDL-3   | 3.43E-04 | 0.002    |    |    |    |    |    |    |    |
| PL-HDL-1          | 5.62E-07 | 8.38E-06 |    |    |    |    |    |    |    |
| PL-HDL-2          | 1.85E-06 | 1.91E-05 |    |    |    |    |    |    |    |
| PL-HDL-3          | 5.88E-07 | 8.38E-06 |    |    |    |    |    |    |    |
| PL-HDL-4          | 1.52E-04 | 0.001    |    |    |    |    |    |    |    |
| Apo-A1-HDL-1      | 1.64E-06 | 1.87E-05 |    |    |    |    |    |    |    |
| Apo-A1-HDL-2      | 3.64E-07 | 6.91E-06 |    |    |    |    |    |    |    |
| Apo-A1-HDL-3      | 1.72E-05 | 1.30E-04 |    |    |    |    |    |    |    |
| Apo-A1-HDL-4      | 0.001    | 0.005    |    |    |    |    |    |    |    |
| Apo-A2- HDL-1     | 0.005    | 0.020    |    |    |    |    |    |    |    |
| Apo-A2-HDL-2      | 4.62E-05 | 2.89E-04 |    |    |    |    |    |    |    |
| Apo-A2-HDL-3      | 0.001    | 0.006    |    |    |    |    |    |    |    |
| TG-LDL            | 0.042    | 0.151    |    |    |    |    |    |    |    |
| Chol-VLDL-1       | 0.031    | 0.119    |    |    |    |    |    |    |    |
| Free Chol-VLDL-2  | 0.008    | 0.033    |    |    |    |    |    |    |    |

\*Grading colors from green to black to red indicate increasing value

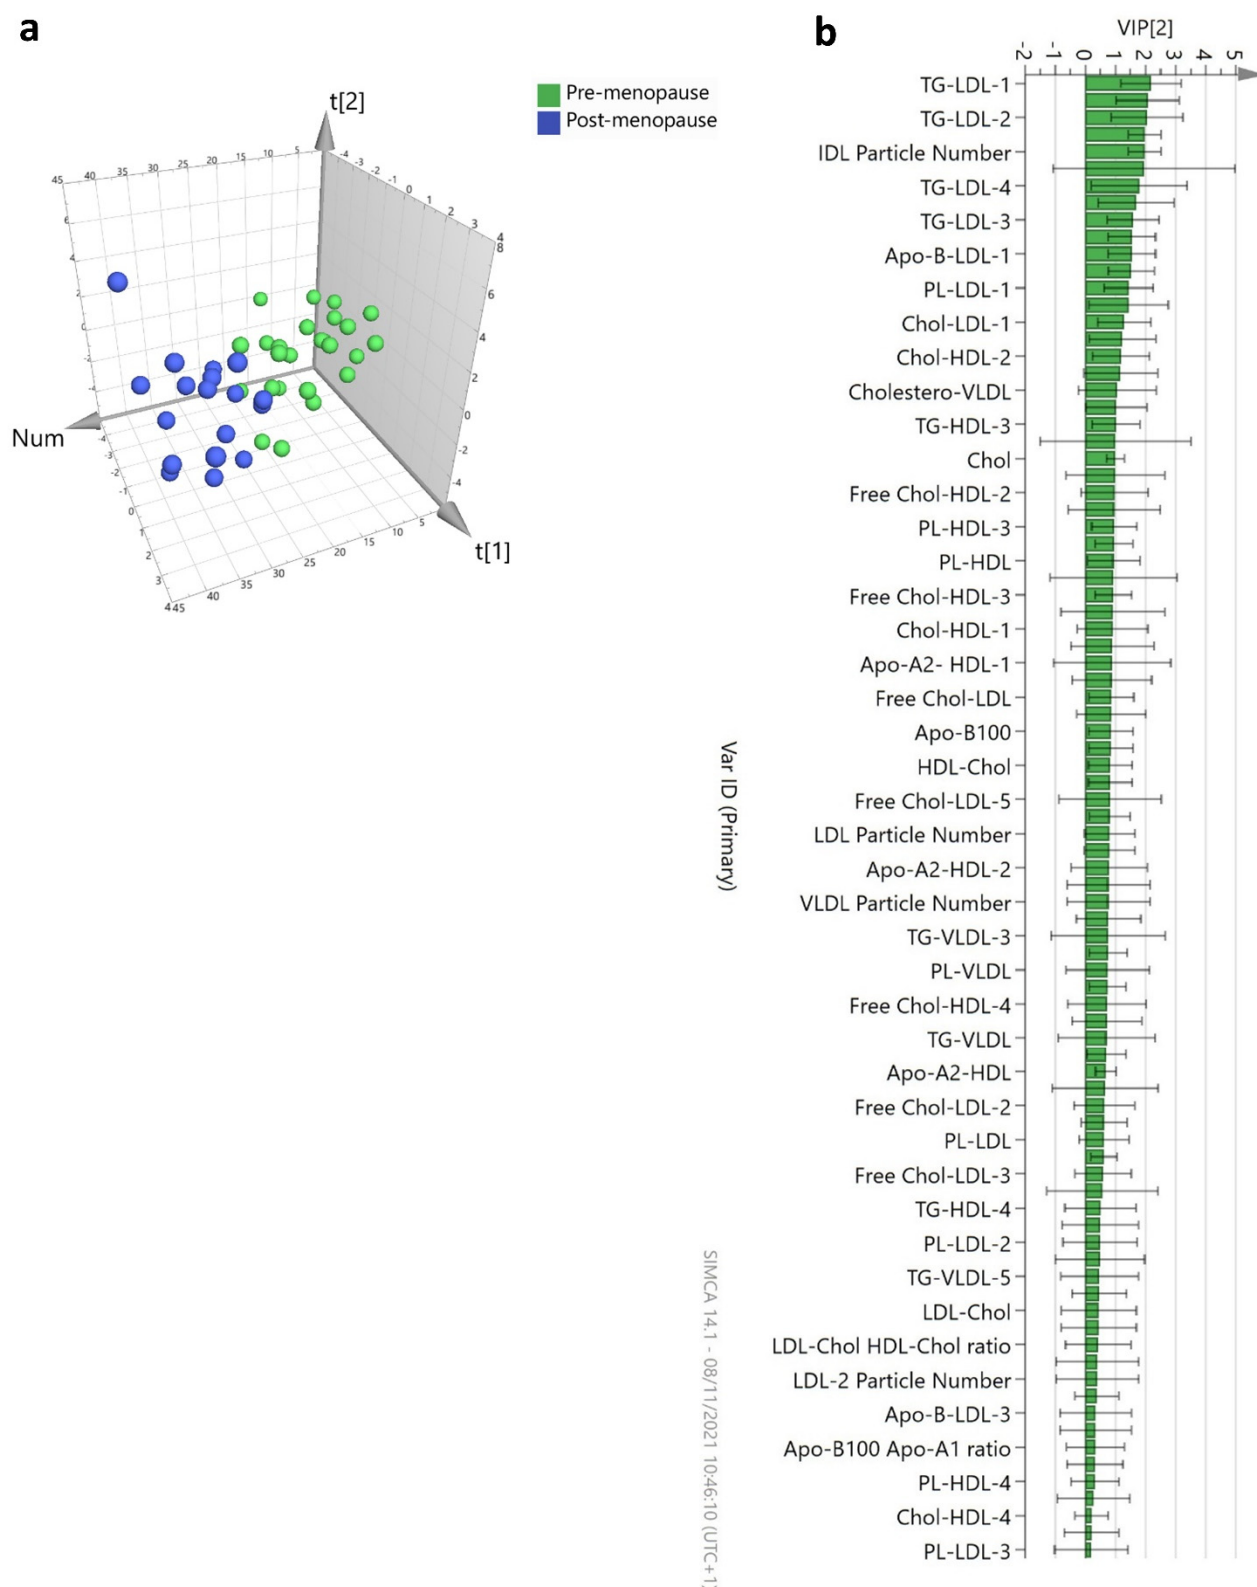

**Figure S1.** Plasma lipoproteins profiles PLS-DA score plot of HER2- positive BC patients in pre-menopause (n= 25) and post-menopause (n=18) (a); Variable importance plot for the projection (VIP) score of the PLS-DA model ranked by increasing values (b).

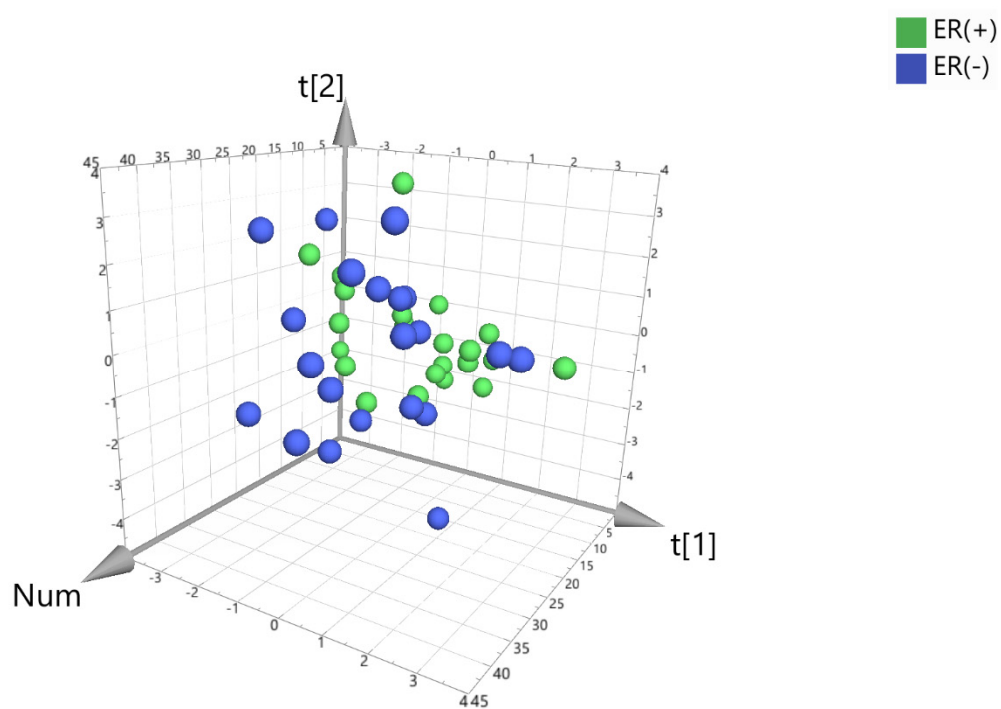

**Figure S2.** PLS-DA of the plasma baseline lipoproteins' profile for BC patients stratified according to the ER status.
